# Supplementary material for: Charting the transcriptional landscape of cells of renin lineage following podocyte depletion
Source: PLoS One. 2017 Dec 12;12(12):e0189084. doi: 10.1371/journal.pone.0189084 (PMC5726629; doi:10.1371/journal.pone.0189084)
Supplement: S5 Table — (XLSX) [file pone.0189084.s006.xlsx]

## Sheet: Sheet1
S5 Table. Upregulated pathways in CoRL following podocyte ablation.
Gene Set Name	Number of Gene Members	Normalized Enrichment Score	FDR
HALLMARK_INTERFERON_GAMMA_RESPONSE	169	2.78409	0
REACTOME_NONSENSE_MEDIATED_DECAY_ENHANCED_BY_THE_EXON_JUNCTION_COMPLEX	75	2.70395	0
REACTOME_PEPTIDE_CHAIN_ELONGATION	59	2.69796	0
REACTOME_SRP_DEPENDENT_COTRANSLATIONAL_PROTEIN_TARGETING_TO_MEMBRANE	82	2.68745	0
REACTOME_3_UTR_MEDIATED_TRANSLATIONAL_REGULATION	74	2.67493	0
REACTOME_INFLUENZA_VIRAL_RNA_TRANSCRIPTION_AND_REPLICATION	71	2.67396	0
KEGG_RIBOSOME	60	2.66806	0
REACTOME_TRANSLATION	113	2.65356	0
REACTOME_INFLUENZA_LIFE_CYCLE	101	2.58104	0
HALLMARK_ALLOGRAFT_REJECTION	170	2.54562	0
HALLMARK_INTERFERON_ALPHA_RESPONSE	79	2.5096	0
REACTOME_INTERFERON_SIGNALING	118	2.48849	0
REACTOME_CYTOKINE_SIGNALING_IN_IMMUNE_SYSTEM	214	2.47508	0
HALLMARK_TNFA_SIGNALING_VIA_NFKB	181	2.42308	0
REACTOME_ACTIVATION_OF_THE_MRNA_UPON_BINDING_OF_THE_CAP_BINDING_COMPLEX_AND_EIFS_AND_SUBSEQUENT_BINDING_TO_43S	43	2.41378	0
HALLMARK_INFLAMMATORY_RESPONSE	187	2.40533	0
KEGG_LEISHMANIA_INFECTION	49	2.39625	0
KEGG_CHEMOKINE_SIGNALING_PATHWAY	156	2.39328	0
KEGG_TOLL_LIKE_RECEPTOR_SIGNALING_PATHWAY	92	2.39021	0
REACTOME_FORMATION_OF_THE_TERNARY_COMPLEX_AND_SUBSEQUENTLY_THE_43S_COMPLEX	35	2.38526	0
REACTOME_METABOLISM_OF_MRNA	170	2.38123	0
REACTOME_METABOLISM_OF_RNA	211	2.38044	0
REACTOME_INTERFERON_GAMMA_SIGNALING	41	2.37953	0
HALLMARK_IL6_JAK_STAT3_SIGNALING	82	2.3689	0
REACTOME_INTERFERON_ALPHA_BETA_SIGNALING	46	2.36774	0
REACTOME_INNATE_IMMUNE_SYSTEM	191	2.34689	0
KEGG_NATURAL_KILLER_CELL_MEDIATED_CYTOTOXICITY	89	2.31643	0
KEGG_B_CELL_RECEPTOR_SIGNALING_PATHWAY	66	2.28639	0
PID_TCR_PATHWAY	61	2.28087	0
PID_CXCR4_PATHWAY	90	2.27312	0
PID_BCR_5PATHWAY	58	2.2719	0
KEGG_SYSTEMIC_LUPUS_ERYTHEMATOSUS	82	2.24349	0
REACTOME_SIGNALING_BY_ILS	95	2.24015	0
REACTOME_AMYLOIDS	58	2.2274	0
PID_IL12_2PATHWAY	54	2.22495	0
KEGG_T_CELL_RECEPTOR_SIGNALING_PATHWAY	98	2.21808	0
KEGG_FC_GAMMA_R_MEDIATED_PHAGOCYTOSIS	84	2.21696	0
BIOCARTA_BCR_PATHWAY	30	2.21518	0
HALLMARK_COMPLEMENT	170	2.20447	0
BIOCARTA_TCR_PATHWAY	42	2.20253	0
PID_CD8_TCR_PATHWAY	50	2.19898	0
REACTOME_CHEMOKINE_RECEPTORS_BIND_CHEMOKINES	44	2.19152	0
KEGG_NOD_LIKE_RECEPTOR_SIGNALING_PATHWAY	45	2.1742	0
PID_FCER1_PATHWAY	57	2.17367	0
KEGG_NEUROTROPHIN_SIGNALING_PATHWAY	108	2.16562	0
REACTOME_MEIOTIC_RECOMBINATION	61	2.16052	0
PID_IL23_PATHWAY	36	2.15738	0
BIOCARTA_FCER1_PATHWAY	34	2.15147	0
HALLMARK_E2F_TARGETS	166	2.14845	0
PID_IFNG_PATHWAY	39	2.13802	0
REACTOME_SEMAPHORIN_INTERACTIONS	54	2.13589	0
PID_IL6_7_PATHWAY	44	2.13407	0
PID_PDGFRB_PATHWAY	116	2.12839	0
REACTOME_ADAPTIVE_IMMUNE_SYSTEM	430	2.12301	0
REACTOME_TOLL_RECEPTOR_CASCADES	98	2.11467	0
REACTOME_RNA_POL_I_PROMOTER_OPENING	41	2.11372	0
HALLMARK_G2M_CHECKPOINT	163	2.09212	0
PID_RAC1_REG_PATHWAY	28	2.08663	2.34099e-05
HALLMARK_KRAS_SIGNALING_UP	175	2.08246	2.30131e-05
REACTOME_IMMUNOREGULATORY_INTERACTIONS_BETWEEN_A_LYMPHOID_AND_A_NON_LYMPHOID_CELL	39	2.07823	2.26296e-05
PID_CD8_TCR_DOWNSTREAM_PATHWAY	52	2.07021	2.22586e-05
PID_GMCSF_PATHWAY	34	2.06135	4.49349e-05
KEGG_SPLICEOSOME	87	2.06067	4.42217e-05
REACTOME_REGULATION_OF_IFNA_SIGNALING	19	2.05508	4.35307e-05
KEGG_ANTIGEN_PROCESSING_AND_PRESENTATION	45	2.048	6.40989e-05
BIOCARTA_PDGF_PATHWAY	30	2.04467	6.31277e-05
REACTOME_MEIOSIS	85	2.04015	8.27894e-05
REACTOME_CHROMOSOME_MAINTENANCE	91	2.03496	8.15719e-05
REACTOME_TELOMERE_MAINTENANCE	59	2.03429	8.03897e-05
KEGG_CYTOKINE_CYTOKINE_RECEPTOR_INTERACTION	217	2.03424	7.92413e-05
PID_IL4_2PATHWAY	58	2.02847	0.000118173
REACTOME_COSTIMULATION_BY_THE_CD28_FAMILY	47	2.02695	0.000116531
REACTOME_GPVI_MEDIATED_ACTIVATION_CASCADE	30	2.0223	0.0001552
KEGG_LEUKOCYTE_TRANSENDOTHELIAL_MIGRATION	100	2.02102	0.000153103
PID_MAPK_TRK_PATHWAY	31	2.01754	0.000151062
REACTOME_IL_3_5_AND_GM_CSF_SIGNALING	39	2.01462	0.000149074
REACTOME_SIGNAL_REGULATORY_PROTEIN_SIRP_FAMILY_INTERACTIONS	11	2.01174	0.000147138
PID_EPO_PATHWAY	32	2.00612	0.000163251
REACTOME_PROCESSING_OF_CAPPED_INTRON_CONTAINING_PRE_MRNA	101	2.00092	0.000178306
REACTOME_SIGNALLING_BY_NGF	177	1.99886	0.000192985
REACTOME_RNA_POL_I_TRANSCRIPTION	61	1.99884	0.000190603
BIOCARTA_IL12_PATHWAY	21	1.99874	0.000188278
BIOCARTA_HIVNEF_PATHWAY	49	1.9984	0.00018601
BIOCARTA_NKCELLS_PATHWAY	16	1.9982	0.000183796
REACTOME_ANTIGEN_ACTIVATES_B_CELL_RECEPTOR_LEADING_TO_GENERATION_OF_SECOND_MESSENGERS	27	1.99749	0.000181633
REACTOME_DEPOSITION_OF_NEW_CENPA_CONTAINING_NUCLEOSOMES_AT_THE_CENTROMERE	42	1.99323	0.000229235
PID_RB_1PATHWAY	57	1.99049	0.000258418
BIOCARTA_P38MAPK_PATHWAY	32	1.98924	0.00027171
BIOCARTA_MAPK_PATHWAY	73	1.98858	0.000268658
KEGG_CYTOSOLIC_DNA_SENSING_PATHWAY	45	1.98845	0.000265672
PID_PI3KCI_PATHWAY	41	1.98409	0.000293682
REACTOME_DNA_STRAND_ELONGATION	27	1.97937	0.000350785
BIOCARTA_IL6_PATHWAY	19	1.97677	0.000376011
SA_B_CELL_RECEPTOR_COMPLEXES	19	1.9752	0.000372011
PID_FRA_PATHWAY	29	1.96868	0.000455515
REACTOME_PLATELET_ACTIVATION_SIGNALING_AND_AGGREGATION	179	1.96865	0.000450771
REACTOME_TCR_SIGNALING	42	1.96824	0.000460318
KEGG_APOPTOSIS	71	1.96641	0.0004696
PID_ERBB1_DOWNSTREAM_PATHWAY	95	1.9628	0.000492645
REACTOME_CELL_CYCLE	324	1.95233	0.000541699
REACTOME_P75_NTR_RECEPTOR_MEDIATED_SIGNALLING	65	1.95009	0.000536335
PID_P73PATHWAY	67	1.94408	0.000583771
HALLMARK_APOPTOSIS	148	1.94251	0.000591769
KEGG_CHRONIC_MYELOID_LEUKEMIA	62	1.94058	0.000624603
REACTOME_MRNA_PROCESSING	117	1.93972	0.000618654
ST_B_CELL_ANTIGEN_RECEPTOR	34	1.93962	0.000612818
ST_TUMOR_NECROSIS_FACTOR_PATHWAY	27	1.93734	0.000645881
REACTOME_ACTIVATED_TLR4_SIGNALLING	81	1.93702	0.000652866
PID_ILK_PATHWAY	37	1.93639	0.000646876
PID_IL8_CXCR2_PATHWAY	28	1.92977	0.000690956
SIG_BCR_SIGNALING_PATHWAY	42	1.92856	0.00074684
KEGG_PRIMARY_IMMUNODEFICIENCY	32	1.92769	0.000740172
REACTOME_SIGNALING_BY_THE_B_CELL_RECEPTOR_BCR	110	1.92767	0.000733622
KEGG_PATHOGENIC_ESCHERICHIA_COLI_INFECTION	41	1.92572	0.000739296
BIOCARTA_FMLP_PATHWAY	33	1.92312	0.000781155
PID_CXCR3_PATHWAY	36	1.9216	0.000846763
KEGG_JAK_STAT_SIGNALING_PATHWAY	134	1.92042	0.000863128
BIOCARTA_CCR5_PATHWAY	17	1.91839	0.000903285
REACTOME_PACKAGING_OF_TELOMERE_ENDS	34	1.91822	0.000895695
BIOCARTA_NTHI_PATHWAY	22	1.91781	0.000888231
ST_T_CELL_SIGNAL_TRANSDUCTION	41	1.91611	0.000926963
BIOCARTA_TCYTOTOXIC_PATHWAY	11	1.91547	0.000919365
BIOCARTA_TPO_PATHWAY	22	1.91331	0.000968463
BIOCARTA_VIP_PATHWAY	24	1.91168	0.00100553
REACTOME_DNA_REPLICATION	161	1.90732	0.00104152
REACTOME_RIG_I_MDA5_MEDIATED_INDUCTION_OF_IFN_ALPHA_BETA_PATHWAYS	58	1.90666	0.00103326
BIOCARTA_MONOCYTE_PATHWAY	10	1.905	0.00104739
KEGG_FC_EPSILON_RI_SIGNALING_PATHWAY	75	1.90474	0.00103921
REACTOME_ACTIVATION_OF_THE_PRE_REPLICATIVE_COMPLEX	22	1.90447	0.00105202
REACTOME_MEIOTIC_SYNAPSIS	54	1.90442	0.00104392
PID_IL27_PATHWAY	25	1.90372	0.00103596
REACTOME_SEMA4D_IN_SEMAPHORIN_SIGNALING	21	1.90317	0.00102811
REACTOME_REGULATION_OF_IFNG_SIGNALING	13	1.90061	0.00107268
REACTOME_IL_2_SIGNALING	38	1.90056	0.00106468
KEGG_DNA_REPLICATION	33	1.90016	0.00106727
BIOCARTA_THELPER_PATHWAY	11	1.9	0.00105942
PID_IL8_CXCR1_PATHWAY	24	1.89952	0.00106159
REACTOME_MRNA_SPLICING	74	1.89841	0.00106371
REACTOME_CELL_CYCLE_MITOTIC	260	1.89789	0.00106631
HALLMARK_PI3K_AKT_MTOR_SIGNALING	94	1.89603	0.00108745
BIOCARTA_CALCINEURIN_PATHWAY	18	1.89588	0.00107974
KEGG_VEGF_SIGNALING_PATHWAY	69	1.8954	0.00110178
PID_REG_GR_PATHWAY	72	1.89134	0.00119052
BIOCARTA_RANKL_PATHWAY	12	1.88785	0.00126862
KEGG_REGULATION_OF_ACTIN_CYTOSKELETON	182	1.88781	0.00125987
BIOCARTA_CASPASE_PATHWAY	21	1.88623	0.00129846
BIOCARTA_RHO_PATHWAY	27	1.88562	0.00128962
BIOCARTA_SPPA_PATHWAY	20	1.88544	0.00128091
BIOCARTA_CDMAC_PATHWAY	15	1.88515	0.00127231
REACTOME_SIGNALLING_TO_ERKS	29	1.87633	0.00150195
BIOCARTA_NKT_PATHWAY	27	1.87245	0.00163947
PID_IL12_STAT4_PATHWAY	30	1.87174	0.00164718
REACTOME_TRAF6_MEDIATED_IRF7_ACTIVATION	23	1.8716	0.00163642
BIOCARTA_NO2IL12_PATHWAY	17	1.87099	0.00162579
REACTOME_GENERATION_OF_SECOND_MESSENGER_MOLECULES	19	1.86877	0.00175928
BIOCARTA_TOLL_PATHWAY	32	1.86832	0.00176587
KEGG_MAPK_SIGNALING_PATHWAY	224	1.86502	0.00189544
REACTOME_INITIAL_TRIGGERING_OF_COMPLEMENT	13	1.86394	0.00192765
PID_NFAT_TFPATHWAY	40	1.86366	0.00193251
REACTOME_CREATION_OF_C4_AND_C2_ACTIVATORS	8	1.86298	0.00195546
REACTOME_NUCLEOTIDE_BINDING_DOMAIN_LEUCINE_RICH_REPEAT_CONTAINING_RECEPTOR_NLR_SIGNALING_PATHWAYS	37	1.86264	0.00195208
REACTOME_NOD1_2_SIGNALING_PATHWAY	25	1.86262	0.00194003
PID_RAC1_PATHWAY	49	1.86117	0.00198853
REACTOME_SIGNALING_BY_SCF_KIT	64	1.85657	0.00206149
BIOCARTA_IL2_PATHWAY	19	1.85262	0.00216559
BIOCARTA_IL3_PATHWAY	14	1.85221	0.00218606
REACTOME_MYD88_MAL_CASCADE_INITIATED_ON_PLASMA_MEMBRANE	71	1.85176	0.00218133
REACTOME_HEMOSTASIS	388	1.85144	0.00216835
REACTOME_HIV_LIFE_CYCLE	98	1.85074	0.00218002
HALLMARK_IL2_STAT5_SIGNALING	170	1.8432	0.0025426
PID_KIT_PATHWAY	44	1.84079	0.00265619
BIOCARTA_IL22BP_PATHWAY	16	1.84071	0.00264075
PID_CMYB_PATHWAY	72	1.84062	0.00263344
PID_IL2_1PATHWAY	52	1.83827	0.00276083
REACTOME_SIGNALING_BY_RHO_GTPASES	81	1.83767	0.00277632
REACTOME_G_ALPHA1213_SIGNALLING_EVENTS	62	1.83617	0.00281535
BIOCARTA_INTEGRIN_PATHWAY	33	1.83211	0.00311175
REACTOME_INTEGRIN_CELL_SURFACE_INTERACTIONS	72	1.83172	0.00312551
REACTOME_CELL_DEATH_SIGNALLING_VIA_NRAGE_NRIF_AND_NADE	46	1.83159	0.00313121
REACTOME_METABOLISM_OF_NON_CODING_RNA	42	1.82976	0.00322835
REACTOME_EXTENSION_OF_TELOMERES	25	1.82773	0.00336367
HALLMARK_APICAL_JUNCTION	174	1.82532	0.00348949
BIOCARTA_CLASSIC_PATHWAY	12	1.82462	0.00349305
REACTOME_ACTIVATED_NOTCH1_TRANSMITS_SIGNAL_TO_THE_NUCLEUS	25	1.82434	0.00348159
REACTOME_PROCESSIVE_SYNTHESIS_ON_THE_LAGGING_STRAND	15	1.82379	0.00348521
REACTOME_REGULATION_OF_SIGNALING_BY_CBL	16	1.82309	0.00351853
BIOCARTA_GPCR_PATHWAY	30	1.82127	0.00359572
REACTOME_IL_6_SIGNALING	9	1.8196	0.00363525
BIOCARTA_IL10_PATHWAY	17	1.81841	0.00371134
PID_AR_NONGENOMIC_PATHWAY	28	1.81738	0.00375674
REACTOME_SEMA4D_INDUCED_CELL_MIGRATION_AND_GROWTH_CONE_COLLAPSE	18	1.8167	0.00377288
BIOCARTA_EPO_PATHWAY	17	1.81309	0.00401993
REACTOME_HYALURONAN_UPTAKE_AND_DEGRADATION	10	1.80906	0.00426405
PID_NFKAPPAB_ATYPICAL_PATHWAY	17	1.80828	0.00427769
BIOCARTA_MEF2D_PATHWAY	15	1.80819	0.00426272
PID_ENDOTHELIN_PATHWAY	57	1.80806	0.00424791
PID_CD40_PATHWAY	29	1.80493	0.00453545
REACTOME_SIGNALING_BY_GPCR	499	1.80363	0.0046389
PID_ALK1_PATHWAY	25	1.80195	0.0047413
REACTOME_LAGGING_STRAND_SYNTHESIS	19	1.80147	0.00473805
KEGG_PANCREATIC_CANCER	65	1.79997	0.00488044
REACTOME_HYALURONAN_METABOLISM	13	1.79949	0.00488374
REACTOME_MITOTIC_G1_G1_S_PHASES	112	1.79928	0.00489414
BIOCARTA_ETS_PATHWAY	15	1.79916	0.00488365
BIOCARTA_TNFR1_PATHWAY	26	1.79684	0.00507639
BIOCARTA_TNFR2_PATHWAY	18	1.79651	0.00507855
BIOCARTA_CDC42RAC_PATHWAY	15	1.79543	0.00516103
BIOCARTA_TH1TH2_PATHWAY	15	1.79466	0.0051824
PID_TXA2PATHWAY	54	1.79316	0.00528311
REACTOME_INTRINSIC_PATHWAY_FOR_APOPTOSIS	27	1.7896	0.00552834
REACTOME_IL_RECEPTOR_SHC_SIGNALING	25	1.78757	0.00562034
REACTOME_REMOVAL_OF_THE_FLAP_INTERMEDIATE_FROM_THE_C_STRAND	10	1.78651	0.00571099
BIOCARTA_COMP_PATHWAY	17	1.78604	0.00570397
REACTOME_NGF_SIGNALLING_VIA_TRKA_FROM_THE_PLASMA_MEMBRANE	114	1.78452	0.00584061
KEGG_PATHWAYS_IN_CANCER	288	1.78368	0.00587752
REACTOME_PEPTIDE_LIGAND_BINDING_RECEPTORS	155	1.78004	0.00615627
SIG_INSULIN_RECEPTOR_PATHWAY_IN_CARDIAC_MYOCYTES	46	1.77657	0.00648553
PID_HIV_NEF_PATHWAY	32	1.77541	0.00653913
REACTOME_SEMA3A_PLEXIN_REPULSION_SIGNALING_BY_INHIBITING_INTEGRIN_ADHESION	12	1.77253	0.00677413
PID_SMAD2_3NUCLEAR_PATHWAY	74	1.77222	0.0067623
BIOCARTA_LYM_PATHWAY	9	1.7696	0.00708185
BIOCARTA_CELLCYCLE_PATHWAY	20	1.76957	0.00705601
REACTOME_NRAGE_SIGNALS_DEATH_THROUGH_JNK	32	1.7689	0.00707981
REACTOME_G_ALPHA_I_SIGNALLING_EVENTS	162	1.76733	0.00716492
REACTOME_INTEGRIN_ALPHAIIB_BETA3_SIGNALING	26	1.76629	0.00728634
BIOCARTA_TID_PATHWAY	16	1.7645	0.00746833
REACTOME_MHC_CLASS_II_ANTIGEN_PRESENTATION	65	1.76429	0.00745915
PID_INTEGRIN_A4B1_PATHWAY	32	1.76375	0.00751727
REACTOME_SEMA3A_PAK_DEPENDENT_AXON_REPULSION	13	1.76333	0.00750289
ST_ERK1_ERK2_MAPK_PATHWAY	29	1.76213	0.00754851
REACTOME_MITOTIC_M_M_G1_PHASES	143	1.76206	0.00752219
REACTOME_MUSCLE_CONTRACTION	40	1.76085	0.00761477
BIOCARTA_EGF_PATHWAY	29	1.76079	0.00758801
HALLMARK_MITOTIC_SPINDLE	158	1.76007	0.00767402
PID_ALPHA_SYNUCLEIN_PATHWAY	30	1.75865	0.00783585
BIOCARTA_DC_PATHWAY	20	1.75812	0.00786627
BIOCARTA_GLEEVEC_PATHWAY	21	1.75784	0.00787955
PID_AVB3_OPN_PATHWAY	31	1.75715	0.0079042
PID_P38_ALPHA_BETA_PATHWAY	27	1.75671	0.00791115
REACTOME_TRAF3_DEPENDENT_IRF_ACTIVATION_PATHWAY	12	1.75506	0.00811909
BIOCARTA_MPR_PATHWAY	28	1.75458	0.00813099
REACTOME_G1_S_TRANSITION	92	1.75308	0.00829745
BIOCARTA_HDAC_PATHWAY	25	1.75222	0.00835442
PID_THROMBIN_PAR1_PATHWAY	38	1.75153	0.00841146
KEGG_NON_SMALL_CELL_LUNG_CANCER	47	1.75149	0.00838282
REACTOME_LATE_PHASE_OF_HIV_LIFE_CYCLE	85	1.75101	0.00842784
BIOCARTA_PYK2_PATHWAY	27	1.74941	0.00857207
REACTOME_S_PHASE	91	1.74899	0.00859901
PID_NFAT_3PATHWAY	49	1.74779	0.0087368
REACTOME_CD28_DEPENDENT_VAV1_PATHWAY	10	1.74599	0.00896626
PID_AMB2_NEUTROPHILS_PATHWAY	37	1.74552	0.0089965
BIOCARTA_LAIR_PATHWAY	13	1.74366	0.00914117
REACTOME_CLASS_A1_RHODOPSIN_LIKE_RECEPTORS	247	1.74345	0.00913813
PID_TCR_RAS_PATHWAY	11	1.74218	0.0092601
PID_CASPASE_PATHWAY	46	1.74182	0.0092942
BIOCARTA_FAS_PATHWAY	26	1.741	0.00936589
BIOCARTA_BLYMPHOCYTE_PATHWAY	7	1.73969	0.00950755
REACTOME_NFKB_AND_MAP_KINASES_ACTIVATION_MEDIATED_BY_TLR4_SIGNALING_REPERTOIRE	61	1.73787	0.00972426
KEGG_GLIOMA	55	1.73769	0.00972367
REACTOME_PD1_SIGNALING	11	1.73744	0.00970245
REACTOME_TRANSCRIPTION	153	1.73721	0.00968569
REACTOME_P2Y_RECEPTORS	9	1.73468	0.00999797
REACTOME_SYNTHESIS_OF_DNA	78	1.73371	0.0101124
PID_ERBB2_ERBB3_PATHWAY	39	1.73265	0.0102
BIOCARTA_IL2RB_PATHWAY	35	1.73249	0.0101878
REACTOME_ANTIVIRAL_MECHANISM_BY_IFN_STIMULATED_GENES	56	1.73095	0.0103683
REACTOME_TRAFFICKING_AND_PROCESSING_OF_ENDOSOMAL_TLR	10	1.73021	0.0104223
BIOCARTA_CTL_PATHWAY	10	1.73003	0.0104093
REACTOME_METABOLISM_OF_PROTEINS	338	1.72994	0.010386
REACTOME_SIGNALING_BY_EGFR_IN_CANCER	93	1.72958	0.0103786
REACTOME_GPCR_DOWNSTREAM_SIGNALING	402	1.72919	0.0103962
PID_FOXM1_PATHWAY	35	1.72815	0.0105311
REACTOME_CD28_CO_STIMULATION	25	1.72791	0.0105128
PID_TRKR_PATHWAY	56	1.72763	0.0105151
BIOCARTA_STRESS_PATHWAY	24	1.72649	0.0106239
REACTOME_STRIATED_MUSCLE_CONTRACTION	23	1.72647	0.0105854
ST_PHOSPHOINOSITIDE_3_KINASE_PATHWAY	34	1.72586	0.0106223
REACTOME_NEGATIVE_REGULATORS_OF_RIG_I_MDA5_SIGNALING	24	1.72523	0.0106838
BIOCARTA_CD40_PATHWAY	15	1.72492	0.0107002
BIOCARTA_NGF_PATHWAY	15	1.72213	0.0110324
PID_P53_DOWNSTREAM_PATHWAY	113	1.72167	0.011102
BIOCARTA_KERATINOCYTE_PATHWAY	42	1.71817	0.0115786
PID_CERAMIDE_PATHWAY	47	1.71763	0.0116013
KEGG_FOCAL_ADHESION	168	1.71714	0.0115943
KEGG_CELL_CYCLE	108	1.71505	0.0118535
REACTOME_SIGNALLING_TO_RAS	22	1.71482	0.011851
BIOCARTA_IL7_PATHWAY	17	1.71467	0.0118386
REACTOME_ACTIVATION_OF_CHAPERONE_GENES_BY_ATF6_ALPHA	8	1.71065	0.0125115
REACTOME_G1_PHASE	29	1.70797	0.0128808
REACTOME_PLATELET_AGGREGATION_PLUG_FORMATION	33	1.7057	0.0131844
PID_LYMPH_ANGIOGENESIS_PATHWAY	24	1.70562	0.0131437
PID_HDAC_CLASSII_PATHWAY	33	1.70554	0.0131129
REACTOME_PROLONGED_ERK_ACTIVATION_EVENTS	13	1.7052	0.0131483
PID_INTEGRIN_CS_PATHWAY	23	1.70512	0.0131225
REACTOME_OTHER_SEMAPHORIN_INTERACTIONS	15	1.70476	0.0131581
ST_TYPE_I_INTERFERON_PATHWAY	8	1.7042	0.0132264
REACTOME_CELL_EXTRACELLULAR_MATRIX_INTERACTIONS	11	1.70211	0.0135793
REACTOME_REGULATION_OF_GLUCOKINASE_BY_GLUCOKINASE_REGULATORY_PROTEIN	25	1.69998	0.0139143
HALLMARK_EPITHELIAL_MESENCHYMAL_TRANSITION	179	1.69796	0.0142336
REACTOME_TRANSPORT_OF_MATURE_TRANSCRIPT_TO_CYTOPLASM	39	1.69629	0.0145085
BIOCARTA_TCRA_PATHWAY	9	1.69326	0.0150015
REACTOME_ACTIVATION_OF_BH3_ONLY_PROTEINS	15	1.69314	0.0149704
REACTOME_ACTIVATION_OF_CHAPERONES_BY_ATF6_ALPHA	10	1.69302	0.0149257
KEGG_LYSOSOME	110	1.69274	0.01494
REACTOME_ACTIVATION_OF_ATR_IN_RESPONSE_TO_REPLICATION_STRESS	25	1.69185	0.0150679
BIOCARTA_NFKB_PATHWAY	21	1.69159	0.0150546
BIOCARTA_SALMONELLA_PATHWAY	12	1.69156	0.0150056
BIOCARTA_RANMS_PATHWAY	10	1.69142	0.0149885
REACTOME_SIGNALING_BY_NOTCH1	62	1.69081	0.0150432
PID_CDC42_PATHWAY	59	1.68981	0.0151699
REACTOME_PHOSPHORYLATION_OF_CD3_AND_TCR_ZETA_CHAINS	9	1.68959	0.0151477
REACTOME_NEP_NS2_INTERACTS_WITH_THE_CELLULAR_EXPORT_MACHINERY	25	1.68745	0.0155352
REACTOME_SIGNALING_BY_NOTCH	91	1.68619	0.0157307
PID_RHOA_REG_PATHWAY	33	1.68589	0.0157508
PID_TCPTP_PATHWAY	41	1.6826	0.0164147
KEGG_PRION_DISEASES	31	1.68204	0.0165071
BIOCARTA_HCMV_PATHWAY	17	1.68156	0.0165339
BIOCARTA_GRANULOCYTES_PATHWAY	11	1.68107	0.0165216
PID_AURORA_A_PATHWAY	28	1.67996	0.0166692
REACTOME_TRIF_MEDIATED_TLR3_SIGNALING	63	1.67969	0.0166695
PID_IL3_PATHWAY	24	1.6787	0.0167809
KEGG_ACUTE_MYELOID_LEUKEMIA	49	1.67846	0.0167586
BIOCARTA_ERK5_PATHWAY	14	1.67802	0.0167923
PID_TNF_PATHWAY	39	1.67256	0.0179017
PID_AURORA_B_PATHWAY	33	1.67186	0.0179956
REACTOME_SHC_MEDIATED_SIGNALLING	12	1.67177	0.0179489
REACTOME_AXON_GUIDANCE	197	1.67177	0.017894
BIOCARTA_MCM_PATHWAY	11	1.67135	0.017941
HALLMARK_P53_PATHWAY	171	1.67097	0.0179705
PID_HEDGEHOG_GLI_PATHWAY	44	1.67057	0.0180082
REACTOME_IL_7_SIGNALING	11	1.66957	0.0181874
REACTOME_G_PROTEIN_BETA_GAMMA_SIGNALLING	27	1.66879	0.0182989
BIOCARTA_D4GDI_PATHWAY	12	1.66751	0.0185017
KEGG_HEMATOPOIETIC_CELL_LINEAGE	63	1.66622	0.0187321
KEGG_RENAL_CELL_CARCINOMA	65	1.66527	0.0188824
REACTOME_TRAF6_MEDIATED_INDUCTION_OF_NFKB_AND_MAP_KINASES_UPON_TLR7_8_OR_9_ACTIVATION	64	1.66359	0.0191634
REACTOME_MITOTIC_PROMETAPHASE	73	1.66177	0.0194791
REACTOME_SYNTHESIS_SECRETION_AND_DEACYLATION_OF_GHRELIN	12	1.66122	0.0195435
REACTOME_NUCLEAR_EVENTS_KINASE_AND_TRANSCRIPTION_FACTOR_ACTIVATION	21	1.66098	0.0195387
BIOCARTA_RACCYCD_PATHWAY	24	1.65998	0.019751
PID_INTEGRIN2_PATHWAY	25	1.6575	0.0203126
PID_TCR_JNK_PATHWAY	13	1.65738	0.0202777
KEGG_PROSTATE_CANCER	80	1.65696	0.020323
KEGG_RIG_I_LIKE_RECEPTOR_SIGNALING_PATHWAY	57	1.65686	0.0202919
NABA_ECM_AFFILIATED	114	1.65648	0.0203337
REACTOME_REGULATED_PROTEOLYSIS_OF_P75NTR	10	1.65414	0.0208705
REACTOME_HOMOLOGOUS_RECOMBINATION_REPAIR_OF_REPLICATION_INDEPENDENT_DOUBLE_STRAND_BREAKS	14	1.65336	0.0209698
REACTOME_REPAIR_SYNTHESIS_FOR_GAP_FILLING_BY_DNA_POL_IN_TC_NER	14	1.6533	0.0209214
BIOCARTA_MET_PATHWAY	34	1.6517	0.0212563
REACTOME_COMPLEMENT_CASCADE	23	1.65024	0.0215587
REACTOME_THE_NLRP3_INFLAMMASOME	10	1.64787	0.0220202
KEGG_COLORECTAL_CANCER	56	1.64632	0.0223538
BIOCARTA_AT1R_PATHWAY	28	1.64595	0.0223809
BIOCARTA_GSK3_PATHWAY	25	1.64582	0.0223256
REACTOME_RNA_POL_II_TRANSCRIPTION	75	1.64529	0.0223526
REACTOME_RAP1_SIGNALLING	14	1.64411	0.0226325
REACTOME_HIV_INFECTION	167	1.64354	0.0227126
SA_G1_AND_S_PHASES	12	1.64299	0.0228153
REACTOME_CELL_SURFACE_INTERACTIONS_AT_THE_VASCULAR_WALL	72	1.64228	0.0229371
PID_ANGIOPOIETIN_RECEPTOR_PATHWAY	47	1.64139	0.0230819
REACTOME_G_ALPHA_Z_SIGNALLING_EVENTS	40	1.64114	0.0230909
REACTOME_TRANSPORT_OF_RIBONUCLEOPROTEINS_INTO_THE_HOST_NUCLEUS	25	1.64039	0.0232185
BIOCARTA_ERK_PATHWAY	25	1.64013	0.0232079
REACTOME_NUCLEOTIDE_LIKE_PURINERGIC_RECEPTORS	13	1.63923	0.0233955
BIOCARTA_NFAT_PATHWAY	50	1.6391	0.0233581
BIOCARTA_CTLA4_PATHWAY	15	1.63833	0.0234616
SA_TRKA_RECEPTOR	13	1.63461	0.0244237
REACTOME_TRANSPORT_OF_MATURE_MRNA_DERIVED_FROM_AN_INTRONLESS_TRANSCRIPT	30	1.63394	0.0245534
REACTOME_G2_M_CHECKPOINTS	30	1.63391	0.0244944
PID_MET_PATHWAY	73	1.63355	0.0245369
REACTOME_INFLAMMASOMES	13	1.63346	0.0244892
BIOCARTA_ATM_PATHWAY	17	1.62867	0.0257806
HALLMARK_WNT_BETA_CATENIN_SIGNALING	38	1.62836	0.0258115
REACTOME_ACTIVATION_OF_IRF3_IRF7_MEDIATED_BY_TBK1_IKK_EPSILON	12	1.62765	0.0258972
PID_MYC_REPRESS_PATHWAY	56	1.62754	0.0258613
PID_IL2_STAT5_PATHWAY	28	1.62697	0.0259615
REACTOME_CTLA4_INHIBITORY_SIGNALING	18	1.62598	0.0261309
ST_GA13_PATHWAY	31	1.62536	0.0262373
REACTOME_PLC_BETA_MEDIATED_EVENTS	38	1.62384	0.0266269
REACTOME_DOWNSTREAM_SIGNAL_TRANSDUCTION	81	1.62244	0.0268991
PID_ANTHRAX_PATHWAY	15	1.62204	0.0269251
BIOCARTA_CSK_PATHWAY	19	1.62123	0.0270607
SIG_PIP3_SIGNALING_IN_CARDIAC_MYOCTES	59	1.62026	0.0272207
KEGG_SMALL_CELL_LUNG_CANCER	76	1.61965	0.0273263
REACTOME_ASSOCIATION_OF_LICENSING_FACTORS_WITH_THE_PRE_REPLICATIVE_COMPLEX	7	1.61789	0.0277869
REACTOME_PERK_REGULATED_GENE_EXPRESSION	22	1.61768	0.0277833
REACTOME_ABORTIVE_ELONGATION_OF_HIV1_TRANSCRIPT_IN_THE_ABSENCE_OF_TAT	17	1.61725	0.0278117
BIOCARTA_HER2_PATHWAY	18	1.61715	0.0277682
PID_S1P_S1P4_PATHWAY	12	1.61621	0.028025
PID_AP1_PATHWAY	59	1.61613	0.0279848
REACTOME_SMOOTH_MUSCLE_CONTRACTION	21	1.61593	0.0279765
BIOCARTA_TCAPOPTOSIS_PATHWAY	8	1.61367	0.0285772
KEGG_LONG_TERM_POTENTIATION	58	1.61178	0.0290641
PID_TOLL_ENDOGENOUS_PATHWAY	25	1.60984	0.0296045
BIOCARTA_CHEMICAL_PATHWAY	21	1.60702	0.0304047
PID_P38_MK2_PATHWAY	20	1.60693	0.0303557
ST_INTERLEUKIN_4_PATHWAY	22	1.60491	0.0309203
REACTOME_ANTIGEN_PRESENTATION_FOLDING_ASSEMBLY_AND_PEPTIDE_LOADING_OF_CLASS_I_MHC	14	1.60466	0.0309254
REACTOME_ADP_SIGNALLING_THROUGH_P2RY12	19	1.60378	0.0311179
REACTOME_MRNA_SPLICING_MINOR_PATHWAY	28	1.60364	0.031078
REACTOME_OPIOID_SIGNALLING	72	1.6012	0.0317361
REACTOME_GPCR_LIGAND_BINDING	339	1.59835	0.0325179
BIOCARTA_RAS_PATHWAY	21	1.59753	0.0327077
BIOCARTA_PAR1_PATHWAY	29	1.59577	0.0333224
BIOCARTA_SRCRPTP_PATHWAY	10	1.59511	0.0334684
BIOCARTA_P27_PATHWAY	12	1.59326	0.034015
REACTOME_MAP_KINASE_ACTIVATION_IN_TLR_CASCADE	42	1.59039	0.0349391
REACTOME_ARMS_MEDIATED_ACTIVATION	11	1.58969	0.0350981
REACTOME_DOWNSTREAM_SIGNALING_EVENTS_OF_B_CELL_RECEPTOR_BCR	83	1.58918	0.0352086
REACTOME_DOWNSTREAM_TCR_SIGNALING	26	1.58835	0.0353886
KEGG_COMPLEMENT_AND_COAGULATION_CASCADES	61	1.58744	0.0356229
PID_IL2_PI3K_PATHWAY	31	1.58638	0.0359557
PID_VEGFR1_2_PATHWAY	61	1.58466	0.0364953
REACTOME_PLATELET_SENSITIZATION_BY_LDL	14	1.58404	0.0366134
REACTOME_UNWINDING_OF_DNA	8	1.58388	0.0366055
REACTOME_GLYCOSAMINOGLYCAN_METABOLISM	93	1.58368	0.0366139
REACTOME_DIABETES_PATHWAYS	104	1.58291	0.036838
REACTOME_CDC6_ASSOCIATION_WITH_THE_ORC_ORIGIN_COMPLEX	5	1.58264	0.0368549
REACTOME_ANTIGEN_PROCESSING_CROSS_PRESENTATION	62	1.58155	0.037163
REACTOME_MAPK_TARGETS_NUCLEAR_EVENTS_MEDIATED_BY_MAP_KINASES	27	1.58131	0.0371762
REACTOME_POL_SWITCHING	13	1.5807	0.0372822
REACTOME_G_BETA_GAMMA_SIGNALLING_THROUGH_PLC_BETA	19	1.5801	0.0374239
KEGG_P53_SIGNALING_PATHWAY	58	1.57687	0.0384642
SIG_PIP3_SIGNALING_IN_B_LYMPHOCYTES	31	1.57657	0.0385369
PID_RAS_PATHWAY	25	1.57608	0.0386373
PID_PI3K_PLC_TRK_PATHWAY	31	1.57506	0.0389073
HALLMARK_UNFOLDED_PROTEIN_RESPONSE	99	1.57442	0.0390457
BIOCARTA_PML_PATHWAY	13	1.57245	0.0397794
REACTOME_KERATAN_SULFATE_KERATIN_METABOLISM	27	1.57225	0.0397194
REACTOME_ERK_MAPK_TARGETS	18	1.57066	0.0402418
KEGG_PROGESTERONE_MEDIATED_OOCYTE_MATURATION	76	1.56973	0.0404307
KEGG_OOCYTE_MEIOSIS	97	1.56899	0.0406026
REACTOME_SYNTHESIS_OF_PIPS_AT_THE_PLASMA_MEMBRANE	26	1.56895	0.040531
ST_INTERFERON_GAMMA_PATHWAY	9	1.56835	0.0406553
REACTOME_M_G1_TRANSITION	67	1.56646	0.0412209
REACTOME_ELONGATION_ARREST_AND_RECOVERY	24	1.56641	0.0411454
PID_VEGFR1_PATHWAY	25	1.56436	0.0418365
BIOCARTA_BCELLSURVIVAL_PATHWAY	13	1.56003	0.0434336
REACTOME_G_BETA_GAMMA_SIGNALLING_THROUGH_PI3KGAMMA	24	1.55851	0.0439158
REACTOME_TRANSLOCATION_OF_ZAP_70_TO_IMMUNOLOGICAL_SYNAPSE	7	1.55681	0.0444145
REACTOME_PLATELET_ADHESION_TO_EXPOSED_COLLAGEN	10	1.55651	0.0444047
REACTOME_FACTORS_INVOLVED_IN_MEGAKARYOCYTE_DEVELOPMENT_AND_PLATELET_PRODUCTION	95	1.55623	0.0444106
SA_PROGRAMMED_CELL_DEATH	12	1.55525	0.0446877
REACTOME_THROMBIN_SIGNALLING_THROUGH_PROTEINASE_ACTIVATED_RECEPTORS_PARS	31	1.55443	0.0449249
BIOCARTA_CARDIACEGF_PATHWAY	16	1.55396	0.0450267
SA_CASPASE_CASCADE	16	1.55382	0.0449722
BIOCARTA_RELA_PATHWAY	15	1.55322	0.0451541
REACTOME_RNA_POL_I_RNA_POL_III_AND_MITOCHONDRIAL_TRANSCRIPTION	90	1.55251	0.0453475
REACTOME_SIGNALLING_TO_P38_VIA_RIT_AND_RIN	10	1.55189	0.0454967
KEGG_MISMATCH_REPAIR	22	1.55006	0.0461191
BIOCARTA_CBL_PATHWAY	13	1.54874	0.0465599
BIOCARTA_BAD_PATHWAY	23	1.54852	0.0465342
BIOCARTA_ARF_PATHWAY	15	1.54746	0.0468288
REACTOME_SIGNALING_BY_NOTCH2	12	1.54652	0.0471315
KEGG_NOTCH_SIGNALING_PATHWAY	40	1.54382	0.0482106
REACTOME_UNFOLDED_PROTEIN_RESPONSE	64	1.5438	0.0481109
KEGG_CELL_ADHESION_MOLECULES_CAMS	98	1.54377	0.0480179
PID_ERBB1_RECEPTOR_PROXIMAL_PATHWAY	32	1.54337	0.04811
ST_INTEGRIN_SIGNALING_PATHWAY	74	1.54322	0.0480595
BIOCARTA_ACTINY_PATHWAY	18	1.54276	0.0481261
PID_TCR_CALCIUM_PATHWAY	22	1.54125	0.0486733
REACTOME_HOST_INTERACTIONS_OF_HIV_FACTORS	107	1.54115	0.0486248
BIOCARTA_CTCF_PATHWAY	19	1.54013	0.0490452
REACTOME_SIGNALING_BY_PDGF	107	1.539	0.049396
REACTOME_DEVELOPMENTAL_BIOLOGY	320	1.5384	0.0495363
REACTOME_THE_ROLE_OF_NEF_IN_HIV1_REPLICATION_AND_DISEASE_PATHOGENESIS	22	1.53799	0.0495996
